# Supplementary material for: Activating cobalt inverse spinel oxides via Fe substitution for enhanced water splitting reaction
Source: Royal Society of Chemistry journal article supplement (doi:10.1039/d4se00468j), 2024-01-01
Supplement: d4se00468j1.pdf [file d4se00468j1.pdf]

## **Activating Cobalt Inverse Spinel Oxides via Fe Substitution for Enhanced Water Splitting Reaction**

**Saraswati Roy<sup>1</sup>, Sounak Roy<sup>1,2\*</sup>**

*<sup>1</sup>Department of Chemistry, Birla Institute of Technology and Science Pilani, Hyderabad  
Campus, Hyderabad-500078, India.*

*<sup>2</sup>Materials Center for Sustainable Energy & Environment, Birla Institute of Technology and  
Science Pilani, Hyderabad Campus, Hyderabad – 500078, India*

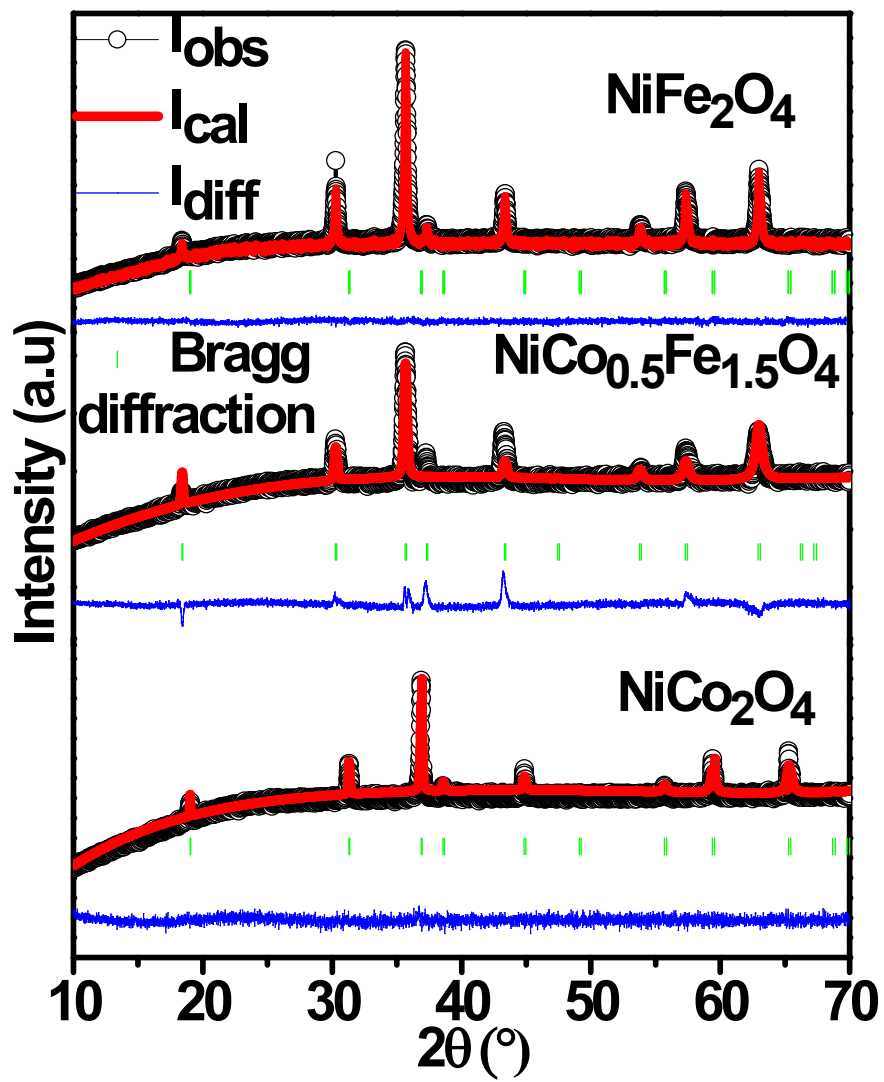

Fig. S1 Rietveld refinement of the three oxides.

**Table S1.** The reliability factors along with refined lattice parameters of three oxides.

|                                | NiCo <sub>2</sub> O <sub>4</sub> |       |          | NiCo <sub>0.5</sub> Fe <sub>1.5</sub> O <sub>4</sub> |         |         |          | NiFe <sub>2</sub> O <sub>4</sub> |       |           |
|--------------------------------|----------------------------------|-------|----------|------------------------------------------------------|---------|---------|----------|----------------------------------|-------|-----------|
| $a$ (Å) = $b$<br>(Å) = $c$ (Å) | 8.1025 (3)                       |       |          | 8.3472 (1)                                           |         |         |          | 8.4009 (5)                       |       |           |
| Space group                    | Fd-3m                            |       |          | Fd-3m                                                |         |         |          | Fd-3m                            |       |           |
| Occupancy                      | Ni                               | Co    | O        | Ni                                                   | Co      | Fe      | O        | Ni                               | Fe    | O         |
|                                | 1 (3)                            | 1 (4) | 0.999(3) | 1 (3)                                                | 0.25(5) | 0.75(3) | 0.959(2) | 1 (2)                            | 1 (3) | 0.999 (3) |
| Wyckoff position               | 8b                               | 8b    |          | 8b                                                   | 8b      | 8b      |          | 8b                               | 8b    |           |
|                                | Ni(1)                            | Co(1) | 32e      | Ni(1)                                                | Co(1)   | Fe(1)   | 32e      | Ni(1)                            | Fe(1) | 32e       |
|                                | 16c                              | 16c   |          | 16c                                                  | 16c     | 16c     |          | 16c                              | 16c   |           |
|                                | Ni(2)                            | Co(2) |          | Ni(2)                                                | Co(2)   | Fe(2)   |          | Ni(2)                            | Fe(2) |           |
| R <sub>Bragg</sub> (%)         | 3.29                             |       |          | 4.02                                                 |         |         |          | 5.08                             |       |           |
| R <sub>f</sub> (%)             | 1.21                             |       |          | 1.07                                                 |         |         |          | 1.16                             |       |           |
| R <sub>wp</sub> (%)            | 2.97                             |       |          | 3.37                                                 |         |         |          | 3.21                             |       |           |
| R <sub>p</sub> (%)             | 2.17                             |       |          | 2.24                                                 |         |         |          | 3.81                             |       |           |
| $\chi^2$                       | 1.17                             |       |          | 1.84                                                 |         |         |          | 2.03                             |       |           |

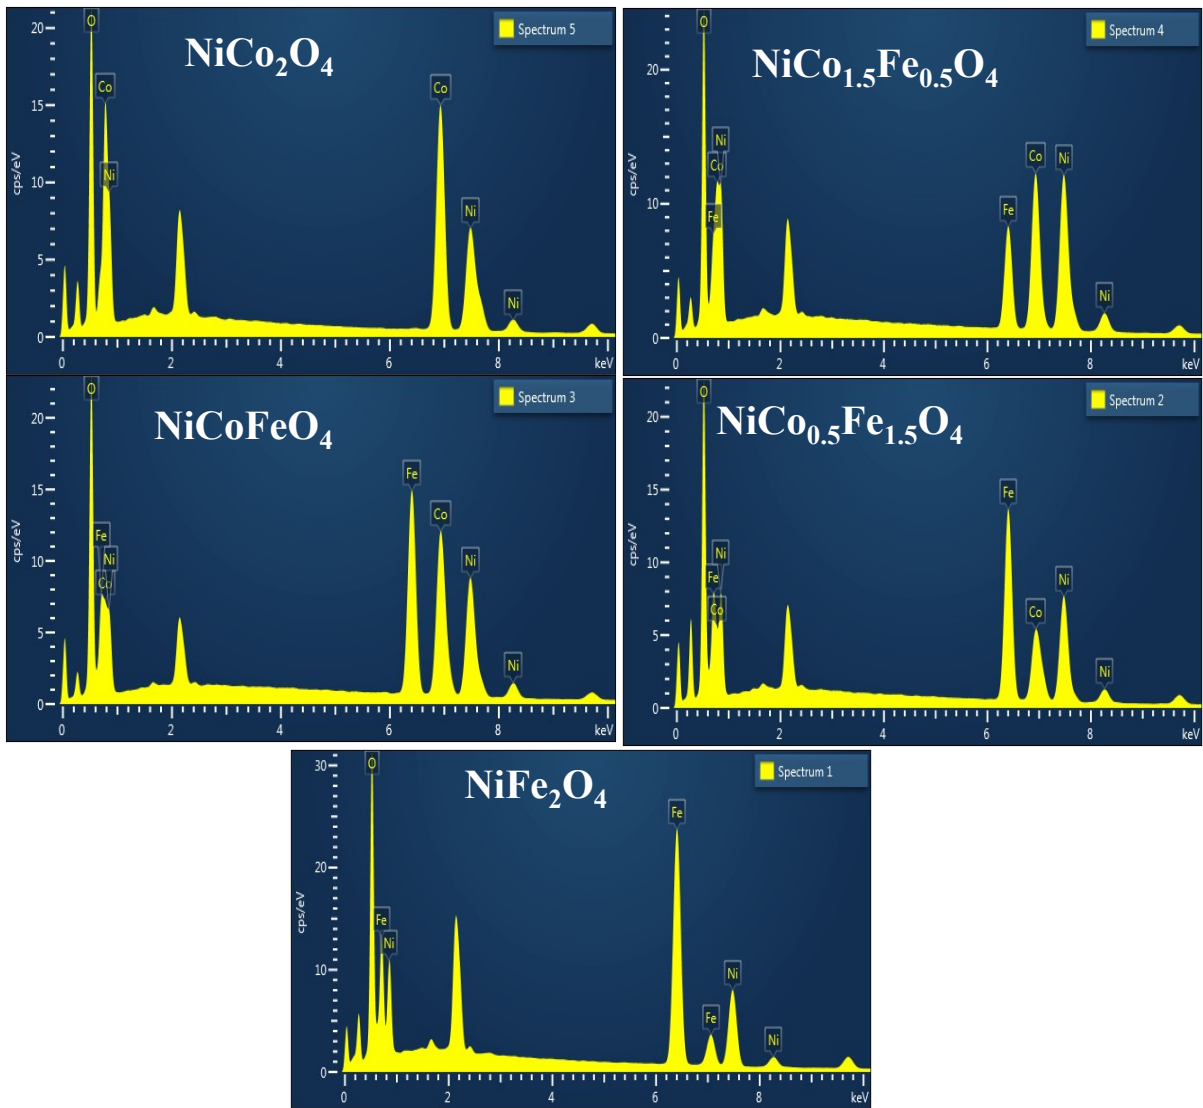

**Fig. S2** EDS of all five synthesized catalysts.

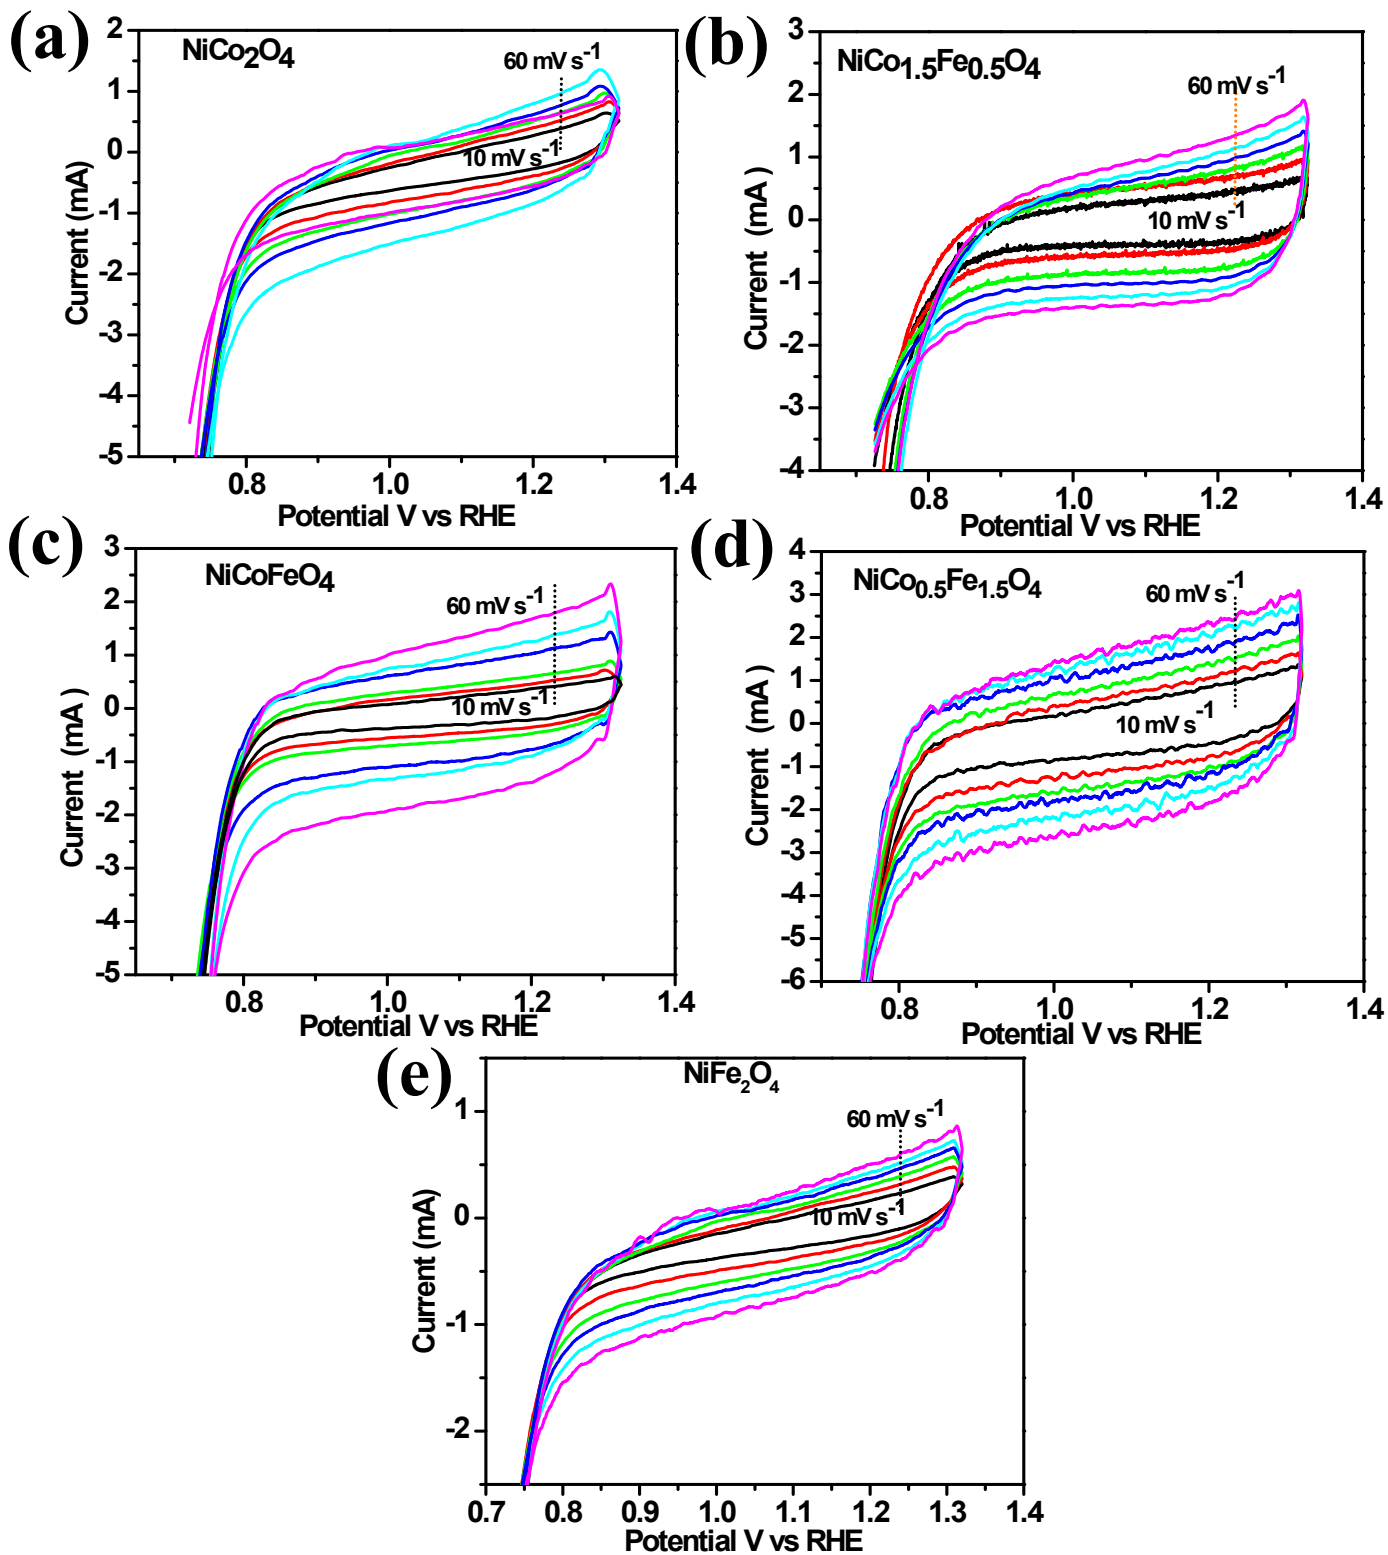

Fig. S3 Non-faradic region CV at 10 to 60  $\text{mV s}^{-1}$  scan rate of synthesized catalysts.

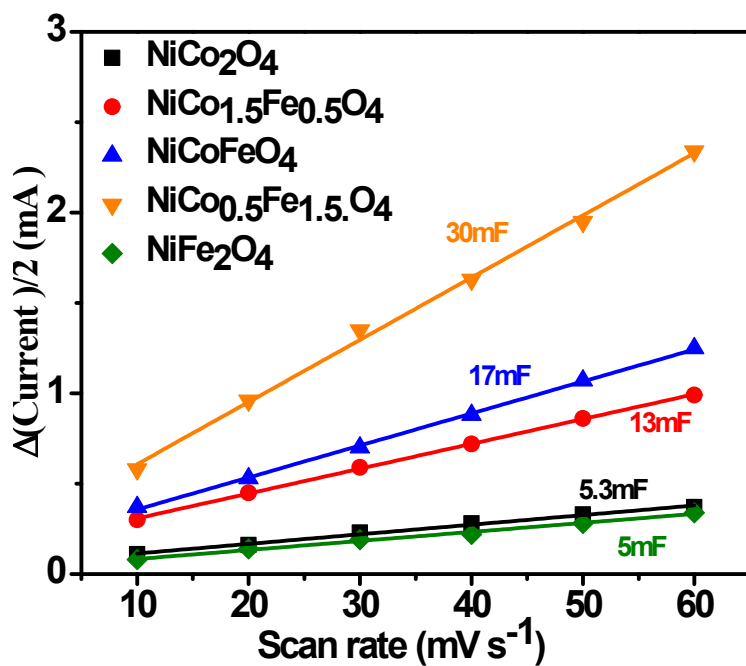

Fig. S4 linear regression between the current density differences in the 1.25 V potential window of CV vs. scan rates of synthesized catalysts.

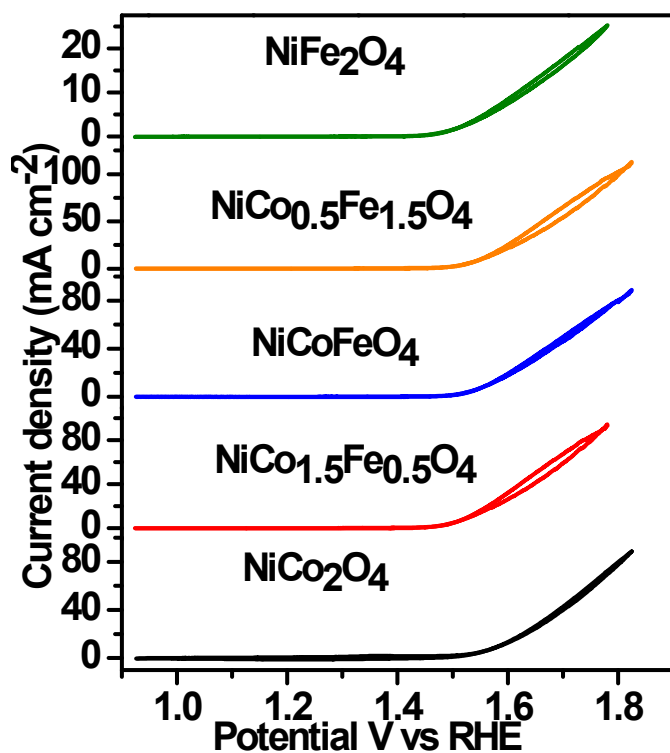

Fig. S5 Faradic region CV at 10 to 60 mV s<sup>-1</sup> scan rate of synthesized catalysts.

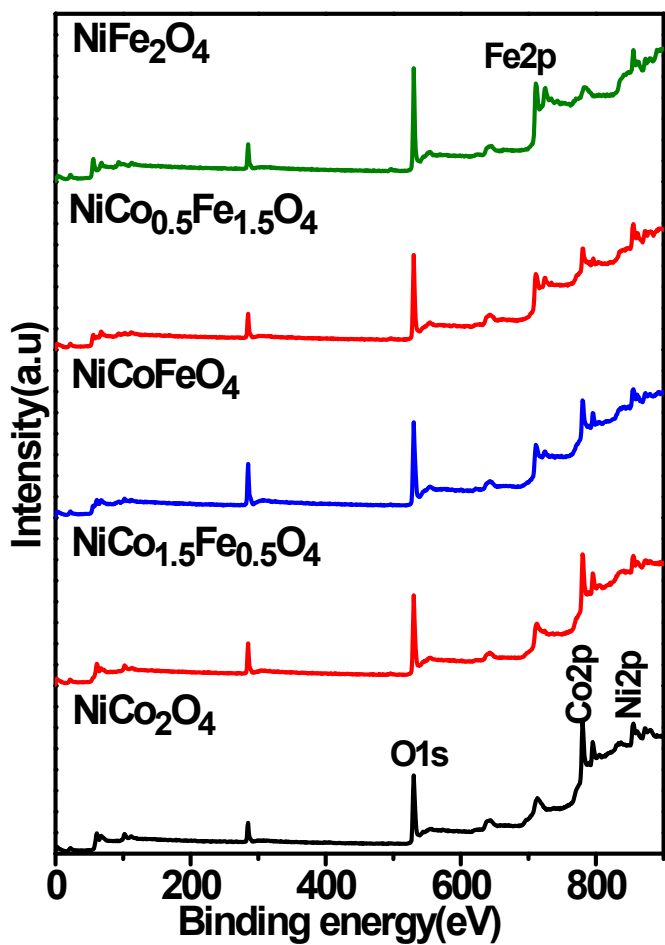

Fig. S6 XPS survey spectra of five synthesized catalysts.

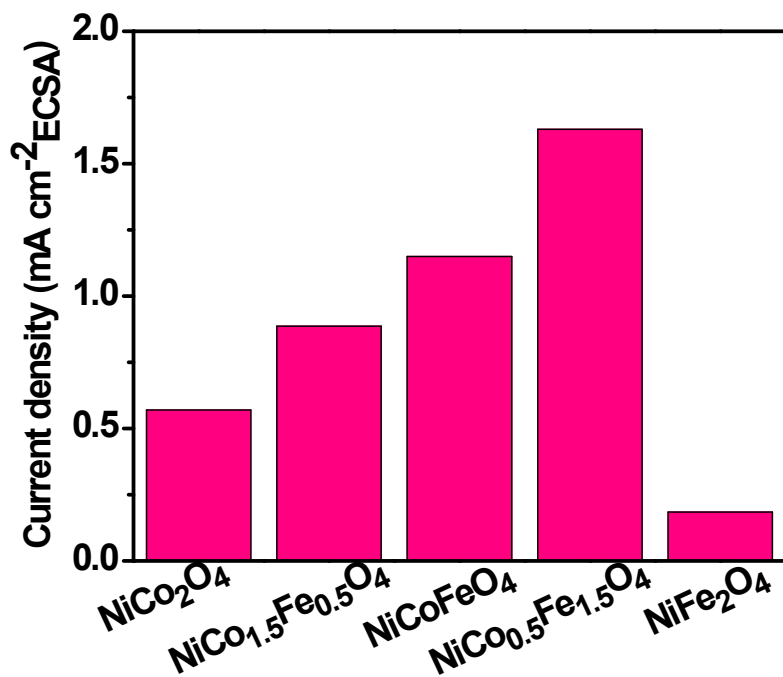

Fig. S7 Intrinsic activity of five synthesized catalysts

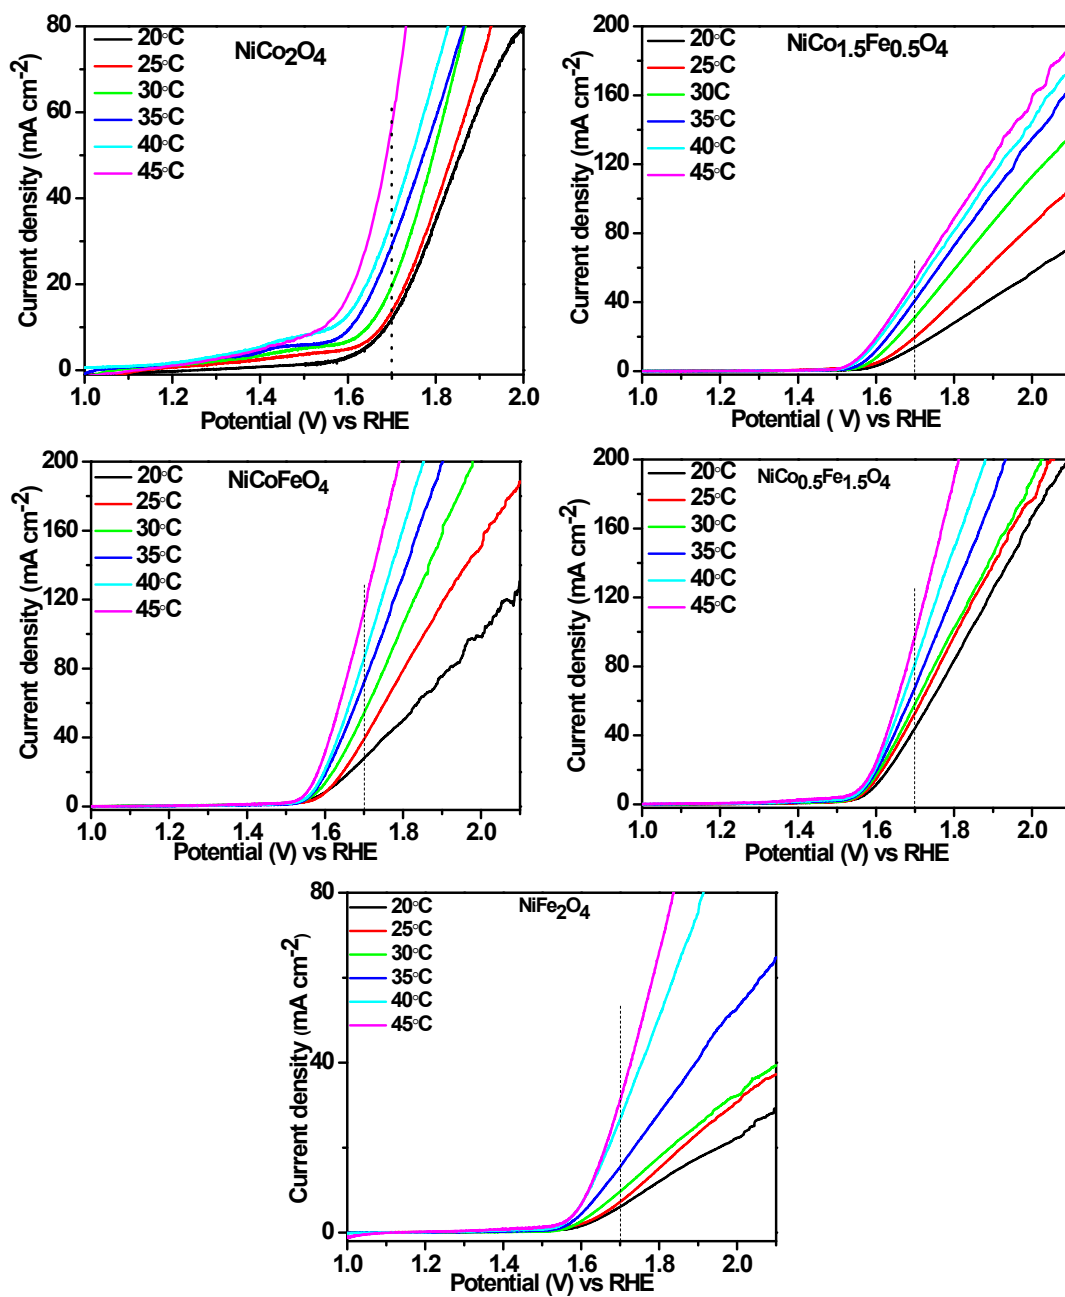

Fig. S8 LSV polarisation curve of five catalysts at different temperatures (20° to 45° C)
